# Supplementary material for: Structure and Dynamics of a Site-Specific Labeled Fc Fragment with Altered Effector Functions
Source: Pharmaceutics. 2019 Oct 21;11(10):546. doi: 10.3390/pharmaceutics11100546 (PMC6835914; doi:10.3390/pharmaceutics11100546)
Supplement: Supplementary file 1 [file pharmaceutics-11-00546-s001.pdf]

# Supplementary Materials: Structure and Dynamics of a Site-Specific Labeled Fc Fragment with Altered Effector Functions

D. Travis Gallagher, Chris McCullough, Robert G. Brinson, Joomi Ahn, John P. Marino and Nazzareno Dimasi

## X-ray Diffraction Statistics

Data collection statistics for the highest resolution shell are given in parentheses.

**Table S1.** Diffraction and Refinement Statistics for ADC-Maia constructs.

| Diffraction                                                | Maia-Cys                                              | Maia-Maleimide                                        |
|------------------------------------------------------------|-------------------------------------------------------|-------------------------------------------------------|
| Space group                                                | <i>P</i> 2 <sub>1</sub> 2 <sub>1</sub> 2 <sub>1</sub> | <i>P</i> 2 <sub>1</sub> 2 <sub>1</sub> 2 <sub>1</sub> |
| <i>a</i> , <i>b</i> , <i>c</i> (nm)                        | 50.19, 81.06, 136.92                                  | 49.87, 80.30, 133.64                                  |
| Resolution range (nm)                                      | 3.000–0.230 (0.238–0.230)                             | 3.000–0.272 (0.285–0.272)                             |
| <i>R</i> <sub>merge</sub> <sup>1</sup>                     | 0.070 (0.241)                                         | 0.091 (0.300)                                         |
| Resolution (nm) at which $\langle I/\sigma(I) \rangle = 3$ | 0.232                                                 | 0.301                                                 |
| Completeness (%)                                           | 95.0 (85.9)                                           | 99.1 (99.7)                                           |
| Redundancy                                                 | 3.6 (3.2)                                             | 3.6 (3.8)                                             |
| Refinement                                                 |                                                       |                                                       |
| Residues                                                   | 418                                                   | 418                                                   |
| Sugar units                                                | 16                                                    | 16                                                    |
| Nonhydrogen protein atoms                                  | 3630                                                  | 3634                                                  |
| Water molecules                                            | 372                                                   | 301                                                   |
| <i>R</i> <sub>work</sub> / <i>R</i> <sub>free</sub>        | 0.224/0.274                                           | 0.244/0.299                                           |
| Overall Mean <i>B</i> -value (nm <sup>2</sup> )            | 0.686                                                 | 0.777                                                 |
| Bond lengths rmsd from ideal (pm)                          | 0.9                                                   | 0.8                                                   |
| Bond angles rmsd from ideal (degrees)                      | 1.36                                                  | 1.47                                                  |

<sup>1</sup>  $R_{\text{merge}} = \sum |I - \langle I \rangle| / \sum I$  where  $\langle I \rangle$  is the mean of symmetry-related reflection intensities.

## Supplementary Figures

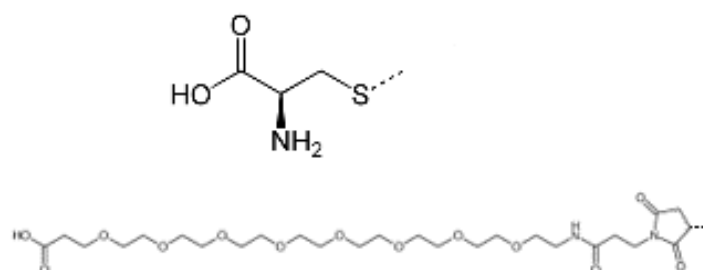

**Figure S1.** Diagrams of the cysteine adduct (top) and the maleimide-PEG8-acid adduct (bottom). For both adducts, the dashed bond on the right links the adduct to the sulfur of C239i.

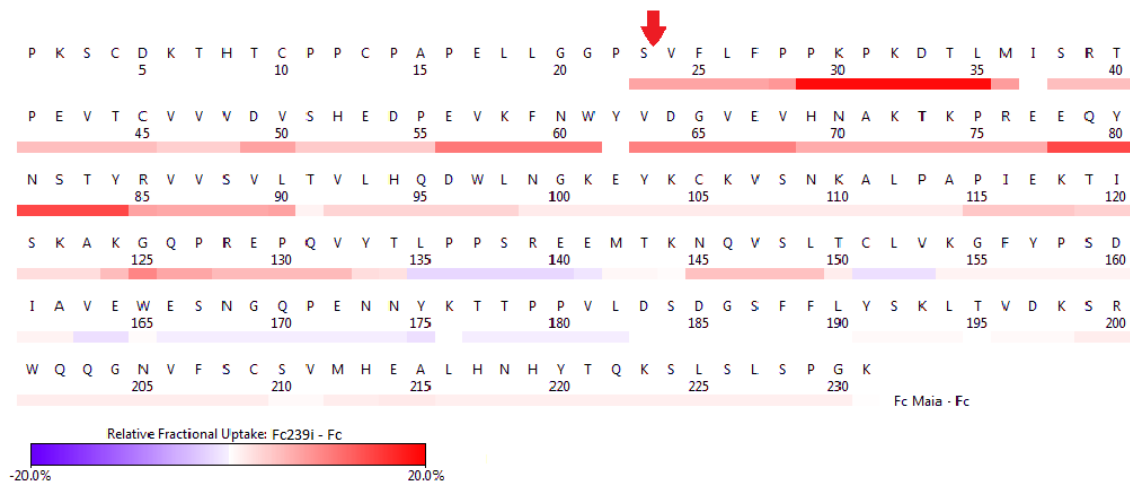

**Figure S2:** HDX heat map by sequence. Red indicates increased HDX in Fc-C239i relative to Fc. Red arrow indicates the insertion site as in Figure 2a.
